# Supplementary material for: Detection of response to tumor microenvironment–targeted cellular immunotherapy using nano-radiomics
Source: PubMed Central journal article supplement — Sci Adv. 2020 Jul 10;6(28):eaba6156. doi: 10.1126/sciadv.aba6156 (PMC7439308; doi:10.1126/sciadv.aba6156), 2020-07-10
Supplement: aba6156_SM.pdf [file aba6156_SM.pdf]

[advances.sciencemag.org/cgi/content/full/6/28/eaba6156/DC1](https://advances.sciencemag.org/cgi/content/full/6/28/eaba6156/DC1)

## Supplementary Materials for

### **Detection of response to tumor microenvironment–targeted cellular immunotherapy using nano-radiomics**

Laxman Devkota, Zbigniew Starosolski, Charlotte H. Rivas, Igor Stupin, Ananth Annapragada, Ketan B. Ghaghada\*, Robin Parihar\*

\*Corresponding author. Email: [kbghagha@texaschildrens.org](mailto:kbghagha@texaschildrens.org) (K.B.G.); [rparihar@bcm.edu](mailto:rparihar@bcm.edu) (R.P.)

Published 10 July 2020, *Sci. Adv.* **6**, eaba6156 (2020)  
DOI: 10.1126/sciadv.aba6156

#### **This PDF file includes:**

Figs. S1 and S2  
Tables S1 to S3

**Supplementary Figure 1. Intra-tumoral MDSCs burden as quantified by flow cytometry.** Representative flow cytometry profiles for definition of MDSCs in Tumor only (T), Tumor+MDSC (T+M) and Tumor+MDSC+NK cell immunotherapy (T+M+Tx) groups (n=4 mice/group). Human MDSCs were defined as CD14<sup>+</sup> (PE-Cy7 axis), HLA-DR<sup>neg</sup> (APC axis) cells (top left quadrant of each dot plot) that also express intracellular S100A9<sup>+</sup> (FITC axis of histograms) within tumor digests after live cell gating and elimination of doublets.

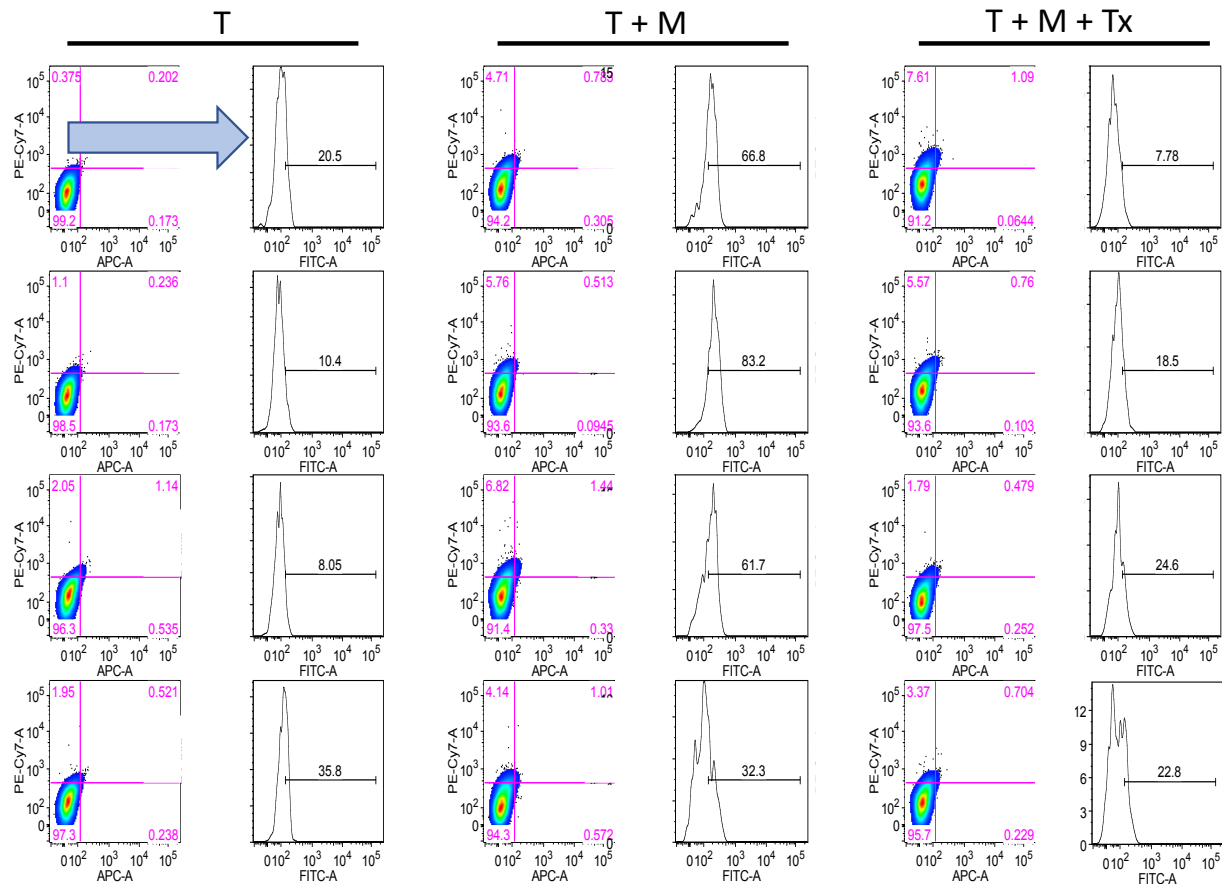

**Supplementary Figure 2. Non-contrast MR imaging.** Representative coronal non-contrast T2-weighted (T2w) MR images for an animal in Tumor only control group (T, left column), Tumor+MDSC untreated group (T+M, middle column) and Tumor+MDSC+NK cell immunotherapy group (T+M+Tx, right column).

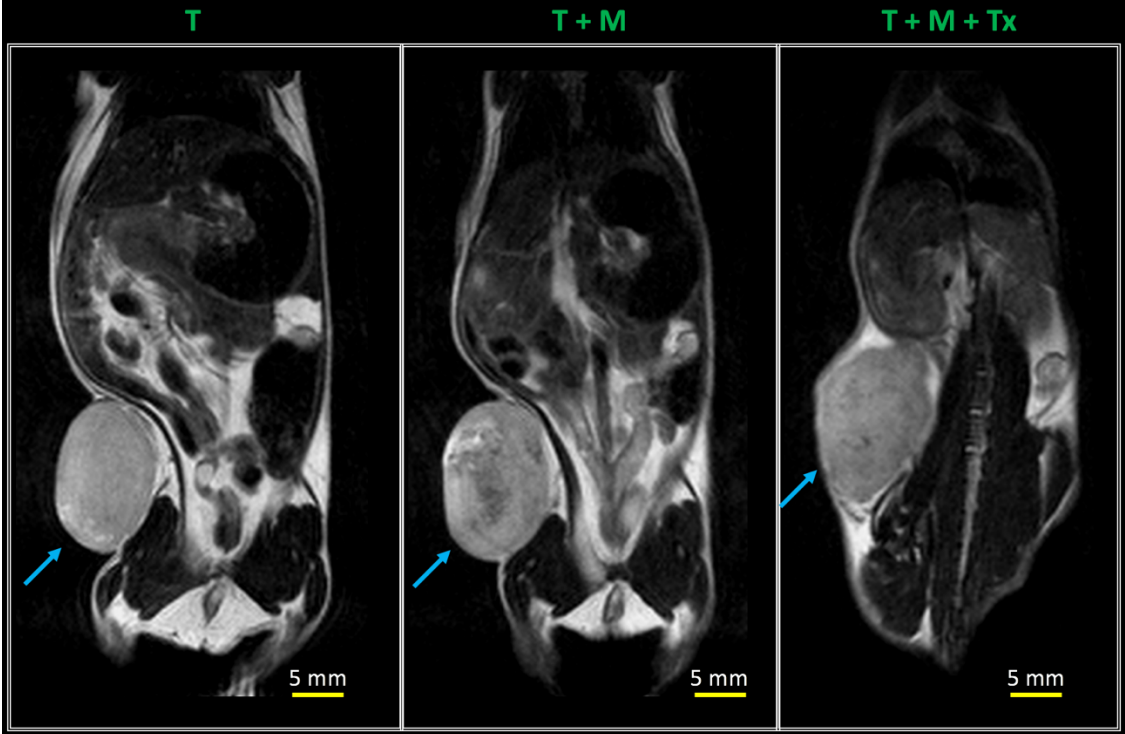

**Supplementary Table 1. Radiomic analysis of nanoparticle contrast-enhanced CT delayed images.** List of radiomic features that enabled differentiation of immunotherapy group from untreated group. Non-parametric Wilcoxon test with Bonferroni correction was applied for statistical analysis and calculation of p-values. A p-value less than 0.05 was considered significantly different.

| <b>Radiomic feature name</b>         | <b>p-value</b> |
|--------------------------------------|----------------|
| glrlm_RunLengthNonUniformity         | 0.0029         |
| glszm_SizeZoneNonUniformity          | 0.0058         |
| glszm_GrayLevelNonUniformity         | 0.0063         |
| ngtdm_Coarseness                     | 0.0072         |
| gldm_DependenceNonUniformity         | 0.0075         |
| gldm_GrayLevelNonUniformity          | 0.0075         |
| glrlm_GrayLevelNonUniformity         | 0.0075         |
| glszm_ZoneVariance                   | 0.0123         |
| glszm_LargeAreaEmphasis              | 0.0123         |
| glszm_LargeAreaHighGrayLevelEmphasis | 0.0267         |

**Supplementary Table 2. Radiomic analysis of nanoparticle contrast-enhanced CT angiographic images.** List of radiomic features that enabled differentiation of immunotherapy group from untreated group. Non-parametric Wilcoxon test with Bonferroni correction was applied for statistical analysis and calculation of p-values. A p-value less than 0.05 was considered significantly different.

| <b>Radiomic feature name</b>          | <b>p-value</b> |
|---------------------------------------|----------------|
| glszm_GrayLevelNonUniformity          | 0.0017         |
| glszm_ZoneVariance                    | 0.0024         |
| glszm_LargeAreaEmphasis               | 0.0024         |
| gldm_GrayLevelNonUniformity           | 0.0026         |
| ngtdm_Coarseness                      | 0.0053         |
| glszm_LargeAreaHighGrayLevelEmphasis  | 0.0063         |
| glrlm_GrayLevelNonUniformity          | 0.0075         |
| glszm_SizeZoneNonUniformity           | 0.0075         |
| firstorder_10Percentile               | 0.0108         |
| gldm_DependenceNonUniformity          | 0.0230         |
| firstorder_Median                     | 0.0237         |
| glszm_SizeZoneNonUniformityNormalized | 0.0333         |
| glrlm_RunLengthNonUniformity          | 0.0357         |

**Supplementary Table 3. Radiomic analysis of non-contrast T2w-MRI images.** List of radiomic features that enabled differentiation of immunotherapy group from untreated group. Non-parametric Wilcoxon test with Bonferroni correction was applied for statistical analysis and calculation of p-values. A p-value less than 0.05 was considered significantly different.

| <b>Radiomic feature name</b> | <b>p-value</b> |
|------------------------------|----------------|
| glrlm_RunLengthNonUniformity | 0.0063         |
| glszm_SizeZoneNonUniformity  | 0.0096         |
| gldm_DependenceNonUniformity | 0.0156         |
| glcm_Correlation             | 0.0412         |
| firstorder_Maximum           | 0.0437         |
